# Supplementary material
Source: publisher site journal article supplement (https://www.dovepress.com/article/supplementary_file/598846/598846%20Revised%20Supplementary%20material.docx)
Supplement: Supplementary file 1 [file 598846%20Revised%20Supplementary%20material.docx]

**Supplementary Online Content**

**Supplementary Figure 1.** Flow chart of participants’ inclusion.

**Supplementary Figure 2.** Scree plot of eigenvalues within 15 sleep variables.

**Supplementary Figure 3.** Correlation matrix between sleep variables.

**Supplementary Figure 4.** Associations between sleep domains (rhythmicity, quality, duration, regularity, and timing) and risk of cognitive impairment were estimated using restricted cubic spline Cox proportional hazards models.

**Supplementary Table 1.** Factor loadings of 5 sleep domains within sleep variables.

**Supplementary Table 2.** Variable selection of elastic net regression.

**Supplementary Table 3.** Hyperparameters for the best-fitting XGBoost model.

**Supplementary Table 4.** Mean SHAP values for variables analysed in XGBoost model.

**Supplementary Table 5.** Subgroup analyses of associations between sleep domains and risk of cognitive impairment.

**Supplementary Table 6.** Sensitivity analyses of sleep domains and cognitive outcomes: cognitive impairment excluding early events and dementia diagnoses.

**Supplementary Table 7.** Sensitive analysis of factor loadings of 5 sleep domains within sleep variables using oblimin rotation.

**Supplementary Table 8.** Sensitive analysis of factor loadings of 5 sleep domains within sleep variables using promax rotation.

**Supplementary Table 9.** Cox regression analysis of sleep domains and cognitive impairment using oblimin rotation.

**Supplementary Table 10.** Cox regression analysis of sleep domains and cognitive impairment using proamx rotation.

**Supplementary Table 11.** Sensitive analysis for interval-censored Cox proportional hazards models.

Supplementary Figure 1. Flow chart of participants’ inclusion.

**
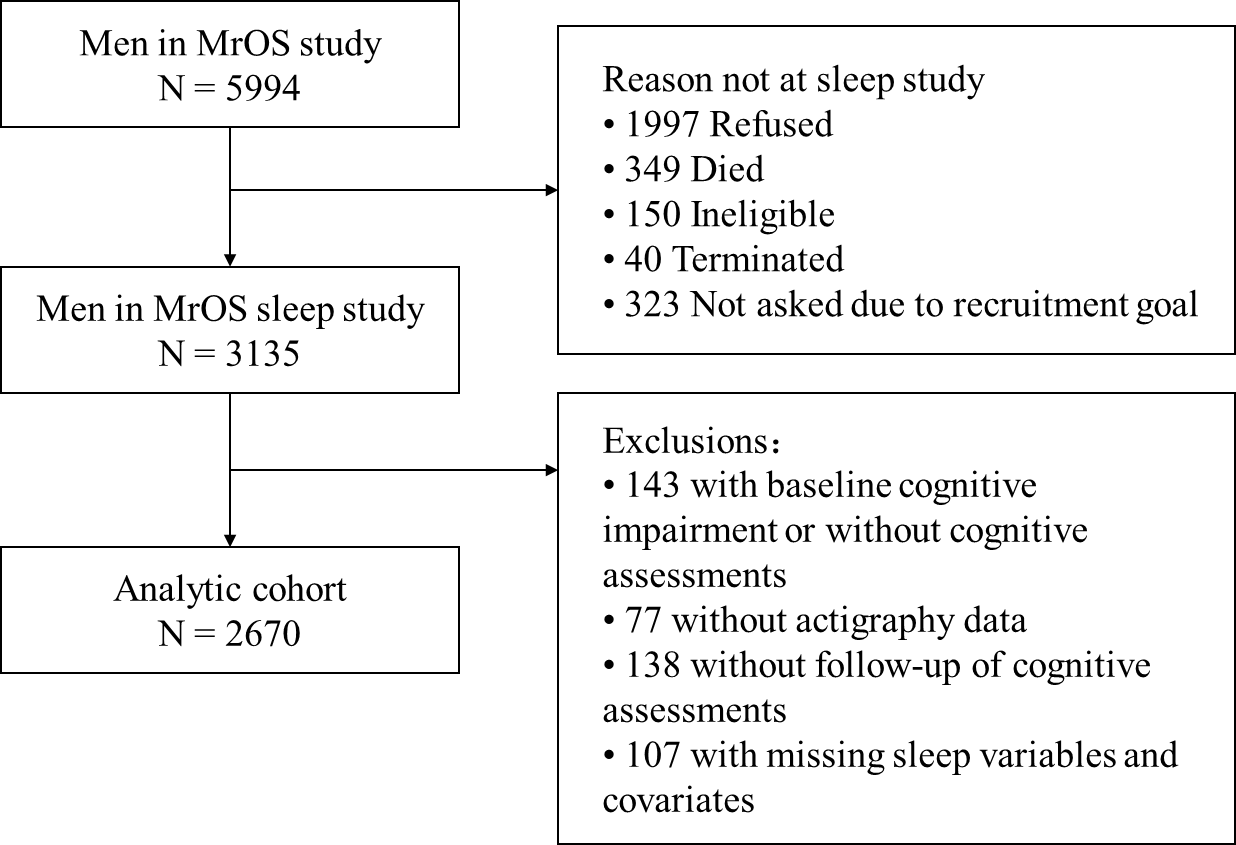
**

**Supplementary Figure 2. Scree plot of eigenvalues within 15 sleep variables.**


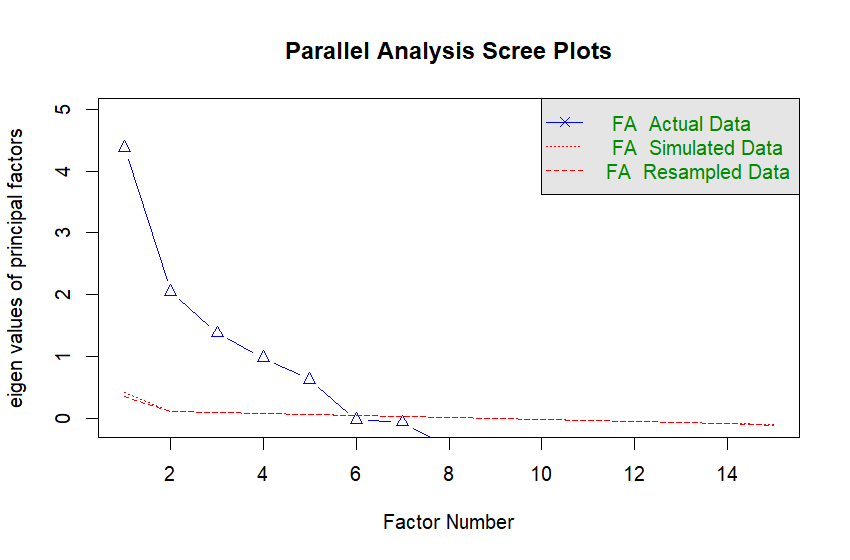


The x-axis represents the number of sleep variables, and the y-axis represents the eigenvalues. Parallel analysis was performed using both simulated and resampled data. The eigenvalues from the observed data exceeded those from the random data for the first five factors, supporting a five-factor solution.

Supplementary Figure 3. Correlation matrix between sleep variables.

**
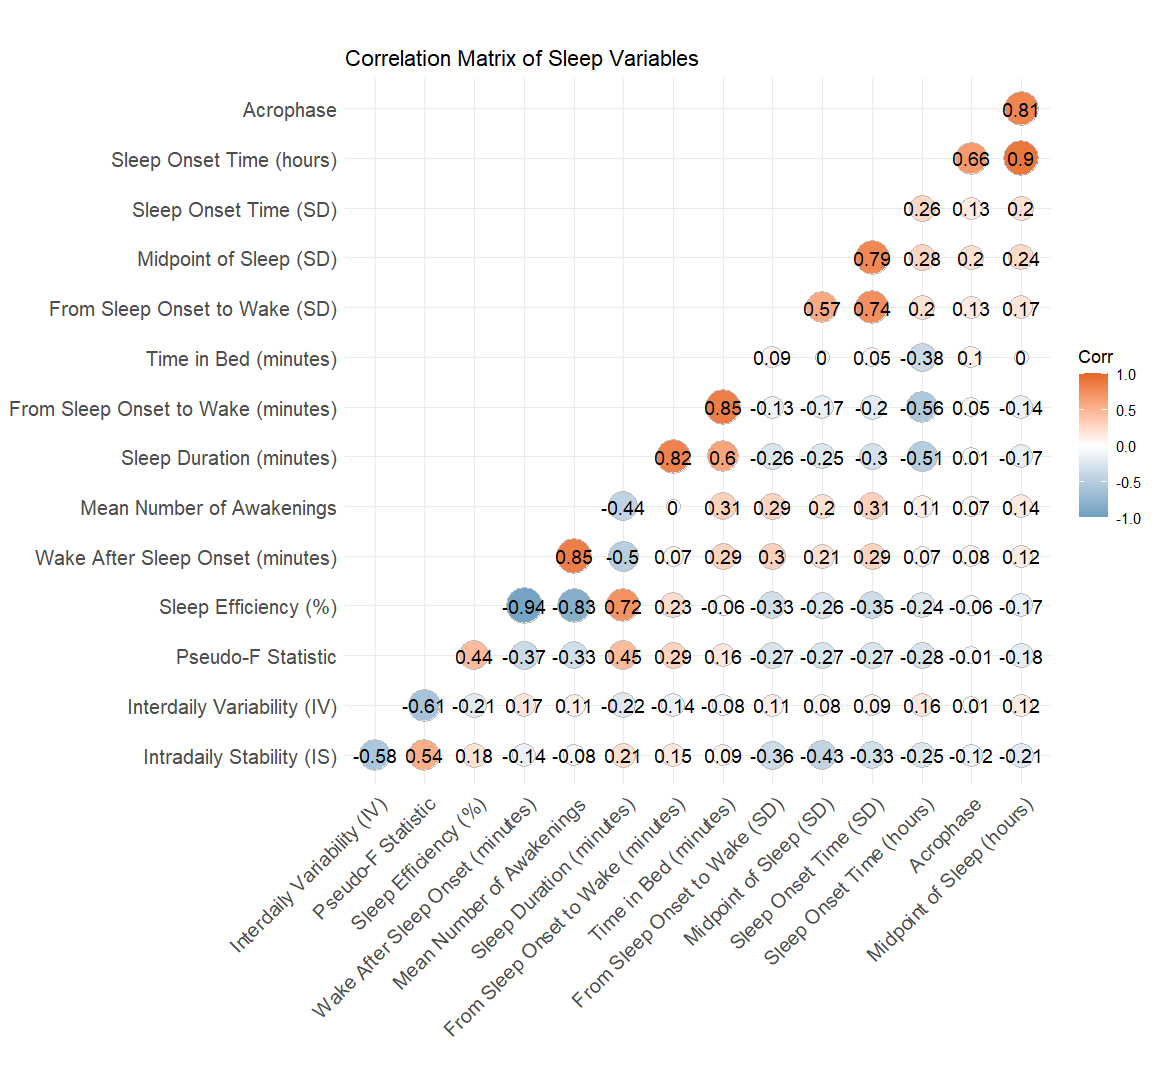
**

**Supplementary Figure 4. Associations between sleep domains (rhythmicity, quality, duration, regularity, and timing) and risk of cognitive impairment were estimated using restricted cubic spline Cox proportional hazards models.**


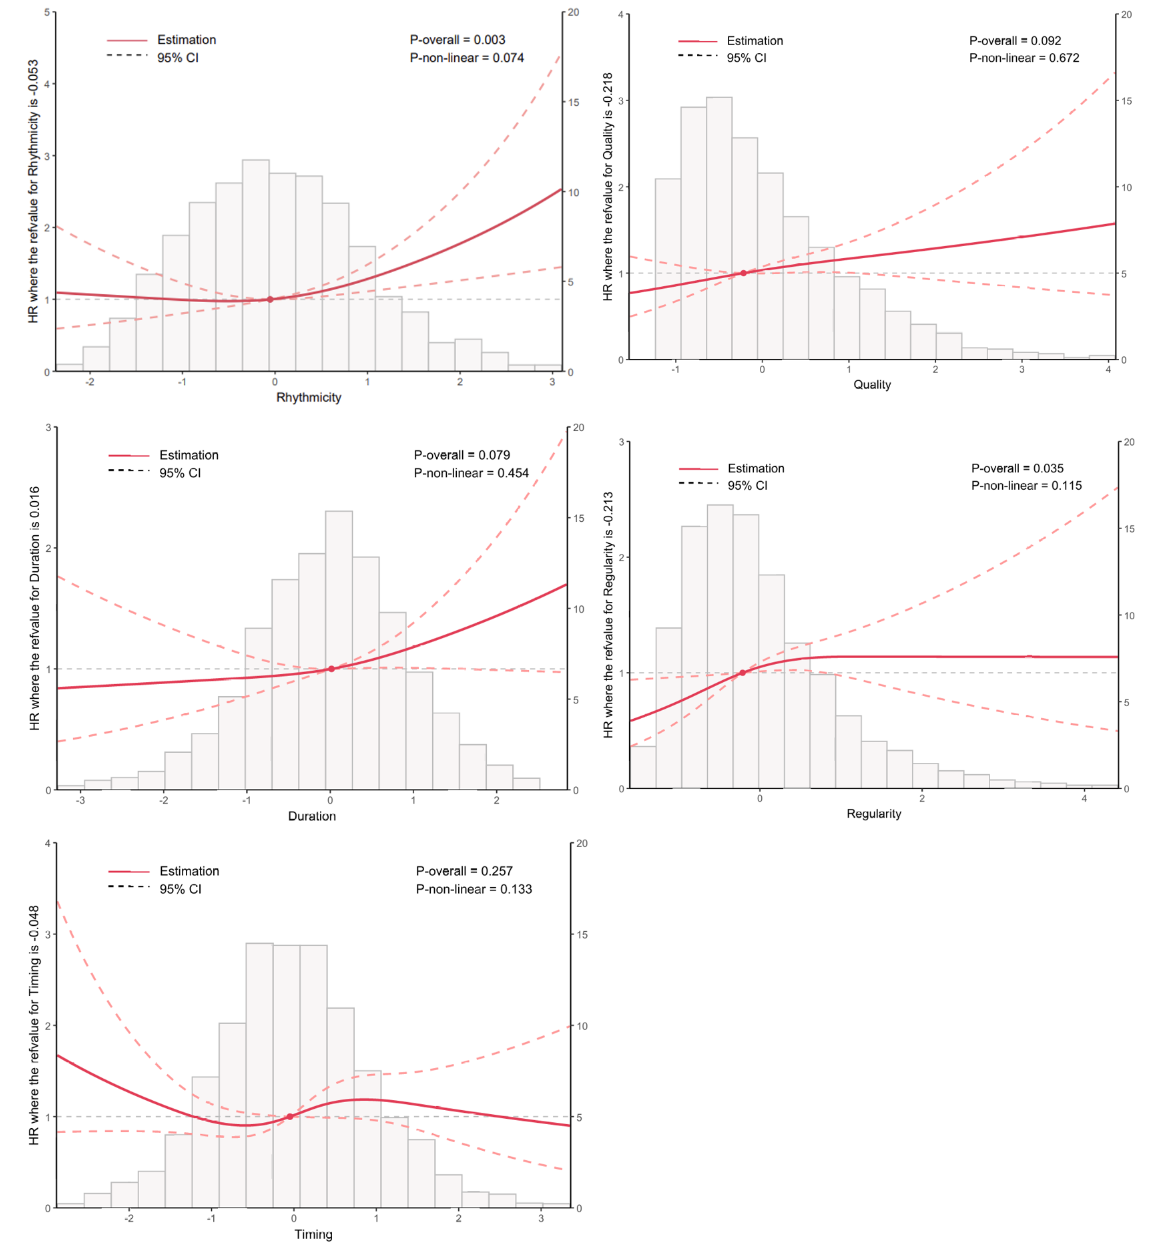


Restricted cubic spline under Cox proportional hazards models were used to examine the non-linear association between sleep domains and risk of cognitive impairment (3 knots). The red line represents the estimated hazard ratio (HR), and the shaded area indicates the 95% confidence interval. The histogram at the bottom illustrates the distribution of sleep domain values in the analytic sample. Models were fully adjusted for key demographics, lifestyle, health-related factors, self-reported medical comorbidities, and other sleep domains (Model 3). The reference value (HR = 1) corresponds to the median value of sleep domains. Overall and non-linear *P*-values are shown in the upper right corner of the plot.

**Supplementary Table 1. Factor loadings of 5 sleep domains within sleep variables.**

| **Variables** | **Rhythmicity** | **Quality** | **Timing** | **Regularity** | **Duration** |
| --- | --- | --- | --- | --- | --- |
| Intradaily Stability (IS) | **0.704** | -0.063 | -0.137 | -0.293 | 0.077 |
| Interdaily Variability (IV) | **-0.779** | 0.117 | 0.055 | 0.017 | -0.098 |
| Pseudo-F Statistic (PsF) | **0.667** | -0.334 | -0.097 | -0.154 | 0.23 |
| Sleep Efficiency (%) | 0.074 | **-0.948** | -0.077 | -0.134 | 0.192 |
| Wake After Sleep Onset (minutes) | -0.076 | **0.985** | 0.026 | 0.089 | 0.102 |
| Mean Number of Awakenings | 0.003 | **0.841** | 0.063 | 0.142 | 0.051 |
| Sleep Onset Time (minutes) | -0.073 | 0.073 | **0.877** | 0.12 | -0.45 |
| Acrophase (timing of peak activity) | 0.025 | 0.041 | **0.816** | 0.056 | 0.148 |
| Midpoint of Sleep (minutes) | -0.067 | 0.081 | **0.989** | 0.083 | -0.015 |
| From Sleep Onset to Wake (SD) | -0.11 | 0.232 | 0.086 | **0.707** | -0.038 |
| Midpoint of Sleep (SD) | -0.129 | 0.134 | 0.158 | **0.777** | -0.065 |
| Sleep Onset Time (SD) | -0.045 | 0.209 | 0.102 | **0.944** | -0.081 |
| Sleep Duration (minutes) | 0.085 | -0.567 | -0.095 | -0.114 | **0.802** |
| From Sleep Onset to Wake (mins) | 0.039 | -0.014 | -0.111 | -0.111 | **0.984** |
| Time in Bed (minutes) | 0.065 | 0.202 | -0.01 | 0.089 | **0.88** |

Values in bold indicate factor loadings greater than 0.6.

**Supplementary Table 2. Variable selection of elastic net regression.**

| **Variables** | **Coefficient** |
| --- | --- |
| Sleep Apnea | -0.30271 |
| Cognitive Score at Baseline | -0.13331 |
| Rhythmicity | 0.12056 |
| Race | 0.10066 |
| Frailty | 0.08314 |
| Age | 0.04228 |
| Depression Score | 0.03384 |
| Duration | 0.03317 |
| Self-Rated Health | 0.02863 |
| Body Mass Index (kg/m²) | -0.02800 |
| Quality | 0.01510 |
| Regularity | 0.01020 |
| Education | -0.00487 |
| Sleep Medication | 0.00043 |

A total of 33 candidate variables, including multidimensional sleep measures (rhythmicity, regularity, duration, quality, and timing), demographic characteristics, lifestyle factors, clinical conditions, and baseline cognitive score, were entered into an elastic net model for variable selection. The optimal penalty parameter (λ) was determined using 10-fold cross-validation. Variables with non-zero coefficients at the optimal λ were retained for subsequent analyses.

**Supplementary Table 3. Hyperparameters for the best-fitting XGBoost model.**

| **Parameters** | **Value** |
| --- | --- |
| Max Depth | 5.000 |
| Learning Rate (eta) | 0.060 |
| Loss Reduction (gamma) | 2.058 |
| Subsample (sample size) | 0.675 |
| Min Child Weight (min_n) | 8.000 |
| Colsample Bytree (mtry) | 0.603 |

**Supplementary Table 4. Mean SHAP values for variables analysed in XGBoost model.**

| **Variables** | **Relative Importance** |
| --- | --- |
| Cognitive Score at Baseline | 0.401 |
| Frailty | 0.297 |
| Rhythmicity | 0.216 |
| Regularity | 0.172 |
| Body Mass Index (kg/m²) | 0.157 |
| Quality | 0.145 |
| Age | 0.139 |
| Duration | 0.115 |
| Depression Score | 0.081 |
| Education | 0.063 |
| Race | 0.051 |
| Sleep Medication | 0.036 |
| Self-Rated Health | 0.014 |
| Sleep Apnea | 0 |

**Supplementary Table 5. Subgroup analyses of associations between sleep domains and risk of cognitive impairment.**

|  | **Variable** | **Subgroups** | **HR (95% CI)** | ***P* value** | ***P value for interaction*** |
| --- | --- | --- | --- | --- | --- |
| Duration |  |  |  |  |  |
|  | Age | <=80 | 1.14 (0.98-1.32) | 0.092 | 0.900 |
|  |  | >80 | 1.14 (0.90-1.44) | 0.265 |  |
|  | BMI | <=25 | 1.11 (0.90-1.35) | 0.329 | 0.763 |
|  |  | >25 | 1.12 (0.95-1.31) | 0.166 |  |
|  | Education | Under college | 1.17 (1.01-1.36) | 0.031* | 0.328 |
|  |  | College | 1.10 (0.87-1.39) | 0.433 |  |
|  | Smoke | Non-smoker | 1.09 (0.90-1.32) | 0.392 | 0.186 |
|  |  | Smoker | 1.18 (1.01-1.39) | 0.042* |  |
|  | Alcohol | Non-drinker | 1.22 (1.01-1.48) | 0.040* | 0.700 |
|  |  | Drinker | 1.08 (0.92-1.26) | 0.354 |  |
| Quality |  |  |  |  |  |
|  | Age | <=80 | 1.14 (0.98-1.32) | 0.086 | 0.610 |
|  |  | >80 | 1.08 (0.86-1.36) | 0.506 |  |
|  | BMI | <=25 | 1.06 (0.85-1.32) | 0.611 | 0.865 |
|  |  | >25 | 1.15 (0.99-1.33) | 0.063 |  |
|  | Education | Under college | 1.13 (0.99-1.30) | 0.075 | 0.753 |
|  |  | College | 1.21 (0.95-1.54) | 0.119 |  |
|  | Smoke | Non-smoker | 1.08 (0.89-1.31) | 0.423 | 0.725 |
|  |  | Smoker | 1.19 (1.01-1.40) | 0.035* |  |
|  | Alcohol | Non-drinker | 1.03 (0.84-1.27) | 0.76 | 0.269 |
|  |  | Drinker | 1.20 (1.03-1.39) | 0.018* |  |
| Regularity |  |  |  |  |  |
|  | Age | <=80 | 1.09 (0.94-1.25) | 0.249 | 0.984 |
|  |  | >80 | 1.14 (0.91-1.44) | 0.246 |  |
|  | BMI | <=25 | 1.30 (1.05-1.61) | 0.014* | 0.127 |
|  |  | >25 | 1.07 (0.92-1.24) | 0.365 |  |
|  | Education | Under college | 1.15 (1.00-1.34) | 0.057 | 0.919 |
|  |  | College | 1.04 (0.84-1.28) | 0.715 |  |
|  | Smoke | Non-smoker | 1.16 (0.97-1.38) | 0.111 | 0.779 |
|  |  | Smoker | 1.10 (0.93-1.30) | 0.28 |  |
|  | Alcohol | Non-drinker | 1.33 (1.10-1.60) | 0.003** | 0.048* |
|  |  | Drinker | 1.02 (0.86-1.21) | 0.806 |  |
| Rhythmicity |  |  |  |  |  |
|  | Age | <=80 | 1.19 (1.01-1.39) | 0.034* | 0.829 |
|  |  | >80 | 1.44 (1.17-1.78) | <0.001*** |  |
|  | BMI | <=25 | 1.21 (0.99-1.48) | 0.068 | 0.867 |
|  |  | >25 | 1.21 (1.02-1.42) | 0.025* |  |
|  | Education | Under college | 1.22 (1.05-1.42) | 0.009** | 0.744 |
|  |  | College | 1.33 (1.04-1.69) | 0.021* |  |
|  | Smoke | Non-smoker | 1.19 (0.99-1.44) | 0.057 | 0.889 |
|  |  | Smoker | 1.22 (1.02-1.46) | 0.030* |  |
|  | Alcohol | Non-drinker | 1.27 (1.05-1.55) | 0.016* | 0.770 |
|  |  | Drinker | 1.19 (1.01-1.41) | 0.034* |  |
| Timing |  |  |  |  |  |
|  | Age | <=80 | 0.97 (0.84-1.13) | 0.707 | 0.066 |
|  |  | >80 | 1.19 (0.94-1.49) | 0.141 |  |
|  | BMI | <=25 | 1.19 (0.96-1.48) | 0.103 | 0.097 |
|  |  | >25 | 0.92 (0.79-1.08) | 0.326 |  |
|  | Education | Under college | 0.99 (0.86-1.15) | 0.931 | 0.940 |
|  |  | College | 0.97 (0.77-1.23) | 0.817 |  |
|  | Smoke | Non-smoker | 0.96 (0.79-1.17) | 0.694 | 0.920 |
|  |  | Smoker | 1.05 (0.89-1.23) | 0.564 |  |
|  | Alcohol | Non-drinker | 0.87 (0.72-1.06) | 0.178 | 0.502 |
|  |  | Drinker | 1.08 (0.91-1.27) | 0.393 |  |

* *P* value < 0.05, ** *P* value < 0.01, *** *P* value < 0.001

Abbreviations: HR, hazard ratio;

Adjusted for age at the sleep visit, race, body mass index, study site, marital status, living arrangement, education level, smoking status, alcohol use, self-rated health condition, depressive symptoms, physical activity, hypertension, congestive heart failure, stroke, myocardial infarction, transient ischemic attack, angina, coronary heart disease, cerebrovascular disease, diabetes, cancer, cataracts, hearing problems, frailty sleep medications within the past 30 days (nonbenzodiazepines and nonbarbiturate sedative-hypnotics), caffeine intake, and tea consumption, sleep apnea, as well as other sleep domains to account for their intercorrelations (Model 3).

**Supplementary Table 6. Sensitivity analyses of sleep domains and cognitive outcomes: cognitive impairment excluding early events and dementia diagnoses.**

|  | **Model 1a** | | **Model 2b** | | **Model 3c** | |
| --- | --- | --- | --- | --- | --- | --- |
| **HR (95% CI)** | ***P* value** | **HR (95% CI)** | ***P* value** | **HR (95% CI)** | ***P* value** |
| Excluding events in 2 years | | | | | | |
| Rhythmicity | 1.21 (1.06-1.39) | 0.006** | 1.20 (1.05-1.38) | 0.009** | 1.21 (1.05-1.39) | 0.008** |
| Regularity | 1.19 (1.05-1.34) | 0.008** | 1.17 (1.03-1.33) | 0.014* | 1.18 (1.04-1.33) | 0.013* |
| Quality | 1.13 (0.99-1.29) | 0.076 | 1.13 (0.98-1.30) | 0.083 | 1.16 (1.01-1.32) | 0.036* |
| Duration | 1.05 (0.91-1.20) | 0.495 | 1.05 (0.92-1.21) | 0.471 | 1.04 (0.91-1.19) | 0.538 |
| Timing | 1.07 (0.93-1.24) | 0.324 | 1.05 (0.91-1.21) | 0.491 | 1.06 (0.92-1.21) | 0.435 |
| Dementia | | | | | | |
| Rhythmicity | 1.26 (1.05-1.52) | 0.012* | 1.24 (1.03-1.50) | 0.020* | 1.27 (1.05-1.52) | 0.012* |
| Regularity | 1.21 (1.02-1.42) | 0.026* | 1.18 (1.00-1.40) | 0.048* | 1.17 (0.99-1.38) | 0.059 |
| Quality | 1.23 (1.04-1.46) | 0.014* | 1.25 (1.05-1.48) | 0.012* | 1.26 (1.07-1.49) | 0.006** |
| Duration | 1.20 (1.00-1.44) | 0.053 | 1.21 (1.00-1.45) | 0.048* | 1.18 (0.99-1.41) | 0.066 |
| Timing | 1.21 (1.01-1.44) | 0.037* | 1.18 (0.99-1.40) | 0.070 | 1.17 (0.99-1.39) | 0.073 |

* *P* value < 0.05, ** *P* value < 0.01

Abbreviations: HR, hazard ratio

a Model 1: adjusted for key demographic, lifestyle, and health-related factors, including age at the sleep visit, race, body mass index, study site, marital status, living arrangement, education level, smoking status, alcohol use, self-rated health condition, depressive symptoms and physical activity.

b Model 2: further adjusted for major medical comorbidities, including hypertension, congestive heart failure, stroke, myocardial infarction, transient ischemic attack, angina, coronary heart disease, cerebrovascular disease, diabetes, cancer, cataracts, hearing problems and frailty.

c Model 3: further adjusted for sleep medications within the past 30 days (nonbenzodiazepines and nonbarbiturate sedative-hypnotics), caffeine intake, and tea consumption, sleep apnea, as well as other sleep domains to account for their intercorrelations.

**Supplementary Table 7. Sensitive analysis of factor loadings of 5 sleep domains within sleep variables using oblimin rotation.**

| **Variables** | **Rhythmicity** | **Quality** | **Timing** | **Regularity** | **Duration** |
| --- | --- | --- | --- | --- | --- |
| Intradaily Stability (IS) | **0.726** | 0.112 | -0.043 | -0.2 | -0.059 |
| Interdaily Variability (IV) | **-0.83** | -0.007 | -0.015 | -0.11 | 0.03 |
| Pseudo-F Statistic (PsF) | **0.687** | -0.2 | -0.007 | -0.03 | 0.104 |
| Sleep Efficiency (%) | 0.037 | **-0.932** | -0.022 | -0.039 | 0.144 |
| Wake After Sleep Onset (minutes) | -0.051 | **0.991** | -0.009 | -0.007 | 0.149 |
| Mean Number of Awakenings | 0.036 | **0.839** | 0.029 | 0.072 | 0.087 |
| Sleep Onset Time (minutes) | -0.03 | -0.01 | **0.857** | 0.037 | -0.367 |
| Acrophase (timing of peak activity) | 0.052 | 0.006 | **0.843** | -0.003 | 0.216 |
| Midpoint of Sleep (minutes) | -0.034 | 0.015 | **1.001** | -0.006 | 0.081 |
| From Sleep Onset to Wake (SD) | -0.051 | 0.069 | -0.015 | **0.724** | 0.029 |
| Midpoint of Sleep (SD) | -0.066 | -0.053 | 0.05 | **0.8** | 0.011 |
| Sleep Onset Time (SD) | 0.04 | 0.004 | -0.024 | **0.99** | -0.012 |
| Sleep Duration (minutes) | 0.043 | -0.521 | -0.019 | -0.041 | **0.772** |
| From Sleep Onset to Wake (mins) | 0.002 | 0.049 | -0.042 | -0.092 | **0.978** |
| Time in Bed (minutes) | 0.058 | 0.228 | 0.028 | 0.099 | **0.893** |

Values in bold indicate factor loadings greater than 0.6.

**Supplementary Table 8. Sensitive analysis of factor loadings of 5 sleep domains within sleep variables using promax rotation.**

| **Variables** | **Rhythmicity** | **Quality** | **Timing** | **Regularity** | **Duration** |
| --- | --- | --- | --- | --- | --- |
| Intradaily Stability (IS) | **0.738** | 0.128 | -0.034 | -0.182 | -0.057 |
| Interdaily Variability (IV) | **-0.854** | -0.02 | -0.024 | -0.14 | 0.037 |
| Pseudo-F Statistic (PsF) | **0.691** | -0.191 | 0.01 | 0.002 | 0.096 |
| Sleep Efficiency (%) | 0.008 | **-0.952** | -0.003 | -0.001 | 0.115 |
| Wake After Sleep Onset (minutes) | -0.039 | **1.02** | -0.014 | -0.047 | 0.189 |
| Mean Number of Awakenings | 0.054 | **0.863** | 0.022 | 0.042 | 0.117 |
| Sleep Onset Time (minutes) | -0.01 | -0.023 | **0.838** | 0.021 | -0.404 |
| Acrophase (timing of peak activity) | 0.043 | 0.01 | **0.852** | -0.015 | 0.195 |
| Midpoint of Sleep (minutes) | -0.039 | 0.014 | **1.003** | -0.024 | 0.052 |
| From Sleep Onset to Wake (SD) | -0.021 | 0.067 | -0.027 | **0.733** | 0.024 |
| Midpoint of Sleep (SD) | -0.034 | -0.06 | 0.037 | **0.814** | -0.002 |
| Sleep Onset Time (SD) | 0.084 | -0.001 | -0.04 | **1.01** | -0.023 |
| Sleep Duration (minutes) | -0.008 | -0.515 | 0.025 | -0.016 | **0.773** |
| From Sleep Onset to Wake (mins) | -0.05 | 0.076 | 0.004 | -0.09 | **1.006** |
| Time in Bed (minutes) | 0.023 | 0.257 | 0.066 | 0.098 | **0.92** |

Values in bold indicate factor loadings greater than 0.6.

**Supplementary Table 9. Cox regression analysis of sleep domains and cognitive impairment using oblimin rotation.**

|  | **Model 1a** | | **Model 2b** | | **Model 3c** | |
| --- | --- | --- | --- | --- | --- | --- |
| **HR (95% CI)** | ***P* value** | **HR (95% CI)** | ***P* value** | **HR (95% CI)** | ***P* value** |
| Rhythmicity | 1.23 (1.09-1.38) | <0.001*** | 1.21 (1.07-1.37) | 0.002** | 1.22 (1.07-1.40) | 0.004** |
| Quality | 1.13 (1.01-1.28) | 0.035* | 1.13 (1.00-1.28) | 0.046* | 1.08 (0.95-1.22) | 0.251 |
| Duration | 1.12 (0.99-1.27) | 0.061 | 1.13 (1.00-1.28) | 0.053 | 1.19 (1.05-1.34) | 0.008** |
| Regularity | 1.16 (1.04-1.30) | 0.011* | 1.15 (1.03-1.29) | 0.017* | 1.09 (0.96-1.25) | 0.176 |
| Timing | 1.03 (0.91-1.16) | 0.658 | 1.01 (0.89-1.15) | 0.851 | 0.98 (0.86-1.11) | 0.707 |

* *P* value < 0.05, ** *P* value < 0.01, *** *P* value < 0.001

Abbreviations: HR, hazard ratio

a Model 1: adjusted for key demographic, lifestyle, and health-related factors, including age at the sleep visit, race, body mass index, study site, marital status, living arrangement, education level, smoking status, alcohol use, self-rated health condition, depressive symptoms and physical activity.

b Model 2: further adjusted for major medical comorbidities, including hypertension, congestive heart failure, stroke, myocardial infarction, transient ischemic attack, angina, coronary heart disease, cerebrovascular disease, diabetes, cancer, cataracts, hearing problems and frailty.

c Model 3: further adjusted for sleep medications within the past 30 days (nonbenzodiazepines and nonbarbiturate sedative-hypnotics), caffeine intake, and tea consumption, sleep apnea, as well as other sleep domains to account for their intercorrelations.

**Supplementary Table 10. Cox regression analysis of sleep domains and cognitive impairment using promax rotation.**

|  | **Model 1a** | | **Model 2b** | | **Model 3c** | |
| --- | --- | --- | --- | --- | --- | --- |
| **HR (95% CI)** | ***P* value** | **HR (95% CI)** | ***P* value** | **HR (95% CI)** | ***P* value** |
| Rhythmicity | 1.23 (1.09-1.39) | <0.001*** | 1.22 (1.07-1.37) | 0.002** | 1.23 (1.07-1.42) | 0.004** |
| Quality | 1.14 (1.01-1.28) | 0.03* | 1.13 (1.01-1.28) | 0.041* | 1.08 (0.95-1.23) | 0.252 |
| Duration | 1.11 (0.98-1.25) | 0.111 | 1.11 (0.98-1.26) | 0.092 | 1.19 (1.05-1.36) | 0.007** |
| Regularity | 1.17 (1.04-1.31) | 0.007** | 1.16 (1.03-1.30) | 0.013* | 1.09 (0.95-1.24) | 0.232 |
| Timing | 1.04 (0.91-1.17) | 0.584 | 1.02 (0.90-1.15) | 0.771 | 0.98 (0.86-1.11) | 0.738 |

* *P* value < 0.05, ** *P* value < 0.01, *** *P* value < 0.001

Abbreviations: HR, hazard ratio

a Model 1: adjusted for key demographic, lifestyle, and health-related factors, including age at the sleep visit, race, body mass index, study site, marital status, living arrangement, education level, smoking status, alcohol use, self-rated health condition, depressive symptoms and physical activity.

b Model 2: further adjusted for major medical comorbidities, including hypertension, congestive heart failure, stroke, myocardial infarction, transient ischemic attack, angina, coronary heart disease, cerebrovascular disease, diabetes, cancer, cataracts, hearing problems and frailty.

c Model 3: further adjusted for sleep medications within the past 30 days (nonbenzodiazepines and nonbarbiturate sedative-hypnotics), caffeine intake, and tea consumption, sleep apnea, as well as other sleep domains to account for their intercorrelations.

**Supplementary Table 11. Sensitive analysis for interval-censored Cox proportional hazards models.**

|  | **Model 1a** | | **Model 2b** | | **Model 3c** | |
| --- | --- | --- | --- | --- | --- | --- |
| **HR (95% CI)** | ***P* value** | **HR (95% CI)** | ***P* value** | **HR (95% CI)** | ***P* value** |
| Rhythmicity | 1.22 (1.07-1.40) | 0.004** | 1.22 (1.06-1.40) | 0.005** | 1.22 (1.08-1.38) | 0.001** |
| Quality | 1.11 (0.99-1.25) | 0.084 | 1.11 (0.98-1.26) | 0.096 | 1.11 (1.00-1.24) | 0.052 |
| Duration | 1.14 (1.00-1.30) | 0.055 | 1.14 (1.00-1.29) | 0.046* | 1.12 (0.97-1.29) | 0.120 |
| Regularity | 1.12 (1.00-1.26) | 0.057 | 1.12 (0.99-1.27) | 0.065 | 1.12 (0.99-1.26) | 0.074 |
| Timing | 1.02 (0.89-1.17) | 0.754 | 1.01 (0.90-1.14) | 0.827 | 1.00 (0.88-1.14) | 0.953 |

* *P* value < 0.05, ** *P* value < 0.01

Abbreviations: HR, hazard ratio

a Model 1: adjusted for key demographic, lifestyle, and health-related factors, including age at the sleep visit, race, body mass index, study site, marital status, living arrangement, education level, smoking status, alcohol use, self-rated health condition, depressive symptoms and physical activity.

b Model 2: further adjusted for major medical comorbidities, including hypertension, congestive heart failure, stroke, myocardial infarction, transient ischemic attack, angina, coronary heart disease, cerebrovascular disease, diabetes, cancer, cataracts, hearing problems and frailty.

c Model 3: further adjusted for sleep medications within the past 30 days (nonbenzodiazepines and nonbarbiturate sedative-hypnotics), caffeine intake, and tea consumption, sleep apnea, as well as other sleep domains to account for their intercorrelations.
